# Supplementary material for: A comparison of clinical and cardiac biomarker profiles of patients with community-acquired pneumonia and with COVID-19 pneumonia in a high HIV prevalence adult population. Running title: Comparison of patients with CAP and COVID-19 pneumonia
Source: Research Square preprint supplement (doi:10.21203/rs.3.rs-7376744/v1), 2025-09-26
Supplement: Supplementary file 1 [file 9291df5455d379e5664456de.docx]

**Supplementary material for the following study:**

**A comparison of clinical and cardiac biomarker profiles of patients with SARS-CoV-2-negative community-acquired pneumonia and with COVID-19 pneumonia in a high HIV prevalence adult population.**

**Authors**

Murimisi Mukansi1, Helen C. Steel2, Theresa M. Rossouw2, Ismail Kalla1, Colin Menezes1, Martin Nieuwoudt3, Ronald Anderson2, Charles Feldman1

**Affiliation**

1. Department of Internal Medicine, Faculty of Health Sciences, University of the Witwatersrand, Johannesburg, South Africa
2. Department of Immunology, School of Medicine, Faculty of Health Sciences, University of Pretoria, Pretoria 0001, South Africa
3. Institute for Biomedical Engineering, Faculty of Engineering, University of Stellenbosch, Stellenbosch, South Africa

Corresponding author:

Murimisi Mukansi

ORCID: 0000-0002-7013-9070

**Supplementary Table 1: Multivariable logistic regression analysis of clinical variables in patients with CAP and COVID-19.**

**
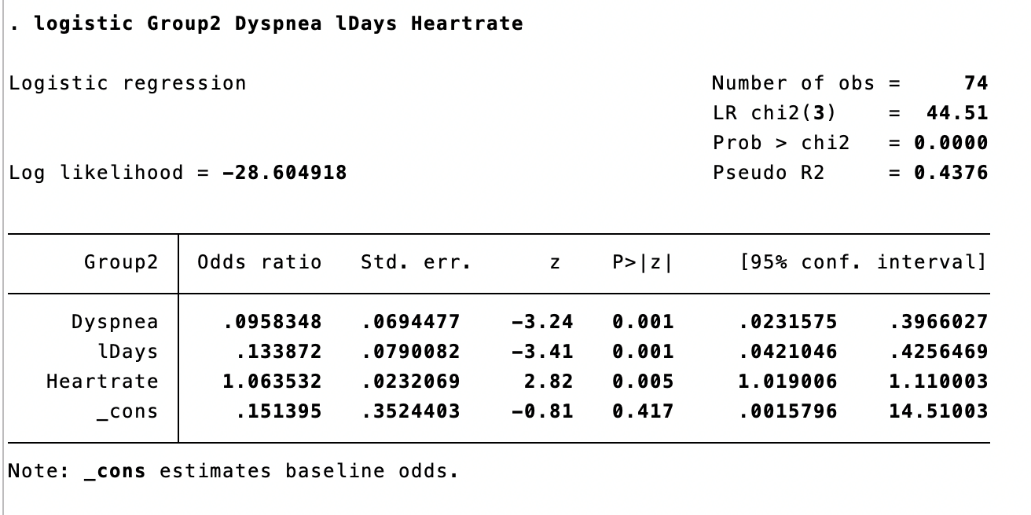
**

Explanation: Group categories: CAP = 0; COVID-19 = 1

Logarithmic transformation of Days (duration of symptoms)

**Supplementary Table 2: Multivariable logistic regression analysis of routine laboratory variables in patients with CAP and COVID-19.**

Explanation: Group categories: CAP = 0; COVID-19 = 1

Logarithmic transformation of SpO2 (peripheral oxygen saturation), CRP (C-reactive protein) and CrCL (Creatinine clearance)

**Supplementary Table 3: Multivariable logistic regression analysis of study-specific cardiac variables in patients with CAP and COVID-19.**

Explanation: Group categories: CAP = 0; COVID-19 = 1

Logarithmic transformation of NTproBNP (N-terminal pro-brain natriuretic peptide) and troponin I

**Supplementary Table 4. Analysis of levels of cardiac biomarkers in CAP and COVID-19 pneumonia groups by sex.**

|  | **CAP** | | | **COVID-19 pneumonia** | | |
| --- | --- | --- | --- | --- | --- | --- |
| **Biomarkers** | **Male**  (n=27) | **Female**  (n=31) | **P-value** | **Male**  (n=36) | **Female**  (n=38) | **P-value** |
| **BNP** | 69.81 (44.87 – 19.10) | 81.00 (54.74 – 111.51) | 0.178 | 63.89 (63.89 – 91.76) | 71.30 (63.89 – 232.92) | 0.075 |
| **NT-pro BNP** | 203.85 (168.17 – 547.46) | 226.87 (146.99 – 496.29) | 0.429 | 232.08 (134.71 – 359.28) | 262.80 (184.10 – 424.90) | 0.155 |
| **CK-MB** | 2,418.95 (1,149.60 – 5,390.09) | 3,276.22 (2,065.44 – 11,640.56) | 0.054 | 3,946.62 (2,983.94 – 7,674.85) | 4,681.20 (2,708.19 – 9,295.14) | 0.451 |
| **Troponin I** | 68.59 (68.59 – 477.80) | 183.96 (68.59 – 335.60) | 0.256 | 240.62 (119.94 – 553.52) | 458.64 (250.19 – 951.45) | **0.005** |
| **Endocan-1** | 1,588.82 (910.67 – 2,119.70) | 1,901.95 (1,295.73 – 3,114.76) | 0.191 | 1,554.34 (661.78 – 3,374.17) | 2,490.41 (1,295.80 – 3,844.90) | 0.065 |

Abbreviations: BNP: B-Type natriuretic peptide; CAP: community-acquired pneumonia; CK-MB: creatinine kinase-myoglobin binding; COVID-19: coronavirus disease-19; n: number; NT-proBNP: N-terminal prohormone of brain natriuretic peptide.

**Supplementary Table 5. Analysis of levels of cardiac biomarkers in CAP ad COVID-19 groups by HIV status.**

| **Biomarker** | **CAP** | | | **COVID** | | |
| --- | --- | --- | --- | --- | --- | --- |
|  | **HIV-positive**  **(n=27)** | **HIV-negative**  **(n=23)** | **P- value** | **HIV-positive**  **(n=24)** | **HIV-negative**  **(n=49)** | **P- value** |
| **BNP** | 78.26 (41.39 – 109.10) | 78.26 (54.74 – 109.10) | 0.244 | 104.23 (63.89 – 297.11) | 63.89 (56.06 – 91.76) | **0.009** |
| **NT-pro BNP** | 203.85 (146.99-544.40) | 226.87 (168.17 – 547.46) | 0.196 | 272.56 (184.10 – 440.63) | 209.31 (139.11 – 363.38) | 0.077 |
| **CK-MB** | 2,769.82 (1,741.37 – 6,521.26) | 3,086.83 (1,838.89 – 7,037.52) | 0.469 | 3,946.62 (2,983.94 – 7,674.85) | 3,697 (2,177.50 – 4,832.24) | 0.130 |
| **Troponin I** | 109.94 (68.59 – 683.16) | 183.96 (68.59 – 572.26) | 0.282 | 458.64 (292.39 – 1,215.38) | 268.68 (145.13 – 654.37) | **0.016** |
| **Endocan-1** | 1,735.86 (910.67 – 2,566.36) | 2,657.02 (979.06 – 2,076.91) | 0.389 | 2,657.02 (1,472.44 – 3,842.20) | 1,924.86 (637.42 – 3,440.47) | **0.019** |

Abbreviations: BNP: B-type natriuretic peptide; CAP: community-acquired pneumonia; CK-MB: creatinine kinase-myoglobin binding; COVID-19: coronavirus disease-19; n: number; NT-pro BNP: N-terminal prohormone of brain natriuretic peptide

**Abbreviations:**

ACEI: angiotensin-converting enzyme inhibitors,

ALT: Alanine transaminase.

AST: Aspartate transaminase

BNP: B-type natriuretic peptide.

BP: Blood pressure

BUN: Blood urea nitrogen

CAP: Community-acquired pneumonia.

CD4: Cluster of differentiation 4

CK-MB: Creatinine kinase-myoglobin binding.

cTnI: Cardiac troponin I

COPD: Chronic obstructive pulmonary disease

COVID-19: Coronavirus disease-19.

CRP: C-reactive protein

CrCL: Creatinine clearance

CVEs: Cardiovascular events.

FiO2: Fraction of inspired oxygen

GGT: Gamma-glutaryl transaminase

HCO3: Bicarbonate.

HIV: Human immunodeficiency virus

K: Potassium

N: Number.

Na: Sodium

NT-pro BNP: N-terminal prohormone of brain natriuretic peptide.

PaO2: Partial pressure of oxygen;

PCR: Polymerase chain reaction.

PCT: Procalcitonin

PMN: Polymorphonuclear leukocyte count

PLR: Platelet lymphocyte ratio

SARS-CoV-2: Severe acute respiratory syndrome coronavirus 2.

SD: Standard deviation.

SpO2: Peripheral oxygen saturation,

VS: Versus.

WBC: White blood cell.
